# Supplementary material for: Photoactive and Luminescent Transition Metal Complexes as Anticancer Agents: A Guiding Light in the Search for New and Improved Cancer Treatments
Source: MDPI journal article supplement (doi:10.3390/biomedicines10030578), 2022-03-01
Supplement: s1 [file s1]

[illegible]

|                                                                                                                                                                                                                                                                                                                                                                                                                                                                                                                                                                                                                                                                                                                                                                                                                                                                                                                                                        |                                                                                                                                                                                                                                                                                                                                                                                                                                                                                                                                                                                                                                                                                                                                                                                                                                                                                                                                                                    |                                                                                                                                                                                                                                                                                                                                                                                                                                                                                                                                                                                                                                                                                                                                                                                                                                                                                                                                                                   |                                                                                                                                                                                                                                                                                                                                                                                                                                                                                                                                                                                                                                                                                                                                                                                                                                                                                                                                                           |                                                                                                                                                                                                                                                                                                                                                                                                                                                                                                                                                                                                                                                                                                                                                                                                                                                                                                                                                            |
|--------------------------------------------------------------------------------------------------------------------------------------------------------------------------------------------------------------------------------------------------------------------------------------------------------------------------------------------------------------------------------------------------------------------------------------------------------------------------------------------------------------------------------------------------------------------------------------------------------------------------------------------------------------------------------------------------------------------------------------------------------------------------------------------------------------------------------------------------------------------------------------------------------------------------------------------------------|--------------------------------------------------------------------------------------------------------------------------------------------------------------------------------------------------------------------------------------------------------------------------------------------------------------------------------------------------------------------------------------------------------------------------------------------------------------------------------------------------------------------------------------------------------------------------------------------------------------------------------------------------------------------------------------------------------------------------------------------------------------------------------------------------------------------------------------------------------------------------------------------------------------------------------------------------------------------|-------------------------------------------------------------------------------------------------------------------------------------------------------------------------------------------------------------------------------------------------------------------------------------------------------------------------------------------------------------------------------------------------------------------------------------------------------------------------------------------------------------------------------------------------------------------------------------------------------------------------------------------------------------------------------------------------------------------------------------------------------------------------------------------------------------------------------------------------------------------------------------------------------------------------------------------------------------------|-----------------------------------------------------------------------------------------------------------------------------------------------------------------------------------------------------------------------------------------------------------------------------------------------------------------------------------------------------------------------------------------------------------------------------------------------------------------------------------------------------------------------------------------------------------------------------------------------------------------------------------------------------------------------------------------------------------------------------------------------------------------------------------------------------------------------------------------------------------------------------------------------------------------------------------------------------------|------------------------------------------------------------------------------------------------------------------------------------------------------------------------------------------------------------------------------------------------------------------------------------------------------------------------------------------------------------------------------------------------------------------------------------------------------------------------------------------------------------------------------------------------------------------------------------------------------------------------------------------------------------------------------------------------------------------------------------------------------------------------------------------------------------------------------------------------------------------------------------------------------------------------------------------------------------|
| Anticancer[All Fields] OR Anti-tumor[All Fields] AND Anti-tumour[All Fields] AND ("drug therapy"[Subheading] OR ("drug"[All Fields] OR "therapy"[All Fields]) OR "drug therapy"[All Fields] OR "chemotherapy"[All Fields] OR "chemotherapy"[All Fields]) OR Chemotherapeutic[All Fields] OR Anticancer[All Fields]) AND ("cell line"[MeSH Terms] OR "cell line"[All Fields]) AND ("cell line"[MeSH Terms] OR ("cell"[All Fields] AND "line"[All Fields]) OR "cell lineS"[All Fields] OR ("cell"[All Fields] AND "lines"[All Fields]) OR "cell lines"[All Fields]) OR G150[All Fields] OR ("lethal dose 50"[MeSH Terms] OR "lethal dose 50"[All Fields] OR "ld50"[All Fields]) OR EC50[All Fields] OR ("in vitro techniques"[MeSH Terms] OR ("vitro"[All Fields] AND "techniques"[All Fields]) OR "in vitro techniques"[All Fields] OR "vitro"[All Fields] OR "in vitro"[All Fields]) AND (y_5[Filter]) AND (Platinum OR "Pt" OR "Pt(II)" OR "Pt(IV)")) | Anticancer[All Fields] OR Anti-tumor[All Fields] AND Anti-tumour[All Fields] AND ("drug therapy"[Subheading] OR ("drug"[All Fields] OR "therapy"[All Fields]) OR "drug therapy"[All Fields] OR "chemotherapy"[All Fields] OR "chemotherapy"[All Fields]) OR Chemotherapeutic[All Fields] OR Anticancer[All Fields]) AND ("cell line"[MeSH Terms] OR "cell line"[All Fields]) AND ("cell line"[MeSH Terms] OR ("cell"[All Fields] AND "line"[All Fields]) OR "cell lineS"[All Fields] OR ("cell"[All Fields] AND "lines"[All Fields]) OR "cell lines"[All Fields]) OR G150[All Fields] OR ("lethal dose 50"[MeSH Terms] OR "lethal dose 50"[All Fields] OR "ld50"[All Fields]) OR EC50[All Fields] OR ("in vitro techniques"[MeSH Terms] OR ("vitro"[All Fields] AND "techniques"[All Fields]) OR "in vitro techniques"[All Fields] OR "vitro"[All Fields] OR "in vitro"[All Fields]) AND (y_5[Filter]) AND (Ru OR Ruthenium OR "Ru(II)" OR "Ru(III)" OR "Ru(IV)")) | Anticancer[All Fields] OR Anti-tumor[All Fields] AND Anti-tumour[All Fields] AND ("drug therapy"[Subheading] OR ("drug"[All Fields] OR "therapy"[All Fields]) OR "drug therapy"[All Fields] OR "chemotherapy"[All Fields] OR "chemotherapy"[All Fields]) OR Chemotherapeutic[All Fields] OR Anticancer[All Fields]) AND ("cell line"[MeSH Terms] OR "cell line"[All Fields]) AND ("cell line"[MeSH Terms] OR ("cell"[All Fields] AND "line"[All Fields]) OR "cell lineS"[All Fields] OR ("cell"[All Fields] AND "lines"[All Fields]) OR "cell lines"[All Fields]) OR G150[All Fields] OR ("lethal dose 50"[MeSH Terms] OR "lethal dose 50"[All Fields] OR "ld50"[All Fields]) OR EC50[All Fields] OR ("in vitro techniques"[MeSH Terms] OR ("vitro"[All Fields] AND "techniques"[All Fields]) OR "in vitro techniques"[All Fields] OR "vitro"[All Fields] OR "in vitro"[All Fields]) AND (y_5[Filter]) AND ("Ir" OR iridium OR "Ir(III)" OR "Ir(0)" OR "Ir(IV)")) | Anticancer[All Fields] OR Anti-tumor[All Fields] AND Anti-tumour[All Fields] AND ("drug therapy"[Subheading] OR ("drug"[All Fields] OR "therapy"[All Fields]) OR "drug therapy"[All Fields] OR "chemotherapy"[All Fields] OR "chemotherapy"[All Fields]) OR Chemotherapeutic[All Fields] OR Anticancer[All Fields]) AND ("cell line"[MeSH Terms] OR "cell line"[All Fields]) AND ("cell line"[MeSH Terms] OR ("cell"[All Fields] AND "line"[All Fields]) OR "cell lineS"[All Fields] OR ("cell"[All Fields] AND "lines"[All Fields]) OR "cell lines"[All Fields]) OR G150[All Fields] OR ("lethal dose 50"[MeSH Terms] OR "lethal dose 50"[All Fields] OR "ld50"[All Fields]) OR EC50[All Fields] OR ("in vitro techniques"[MeSH Terms] OR ("vitro"[All Fields] AND "techniques"[All Fields]) OR "in vitro techniques"[All Fields] OR "vitro"[All Fields] OR "in vitro"[All Fields]) AND (y_5[Filter]) AND (osmium OR "Os(II)" OR "Os(III)" OR "Os(IV)")) | Anticancer[All Fields] OR Anti-tumor[All Fields] AND Anti-tumour[All Fields] AND ("drug therapy"[Subheading] OR ("drug"[All Fields] OR "therapy"[All Fields]) OR "drug therapy"[All Fields] OR "chemotherapy"[All Fields] OR "chemotherapy"[All Fields]) OR Chemotherapeutic[All Fields] OR Anticancer[All Fields]) AND ("cell line"[MeSH Terms] OR "cell line"[All Fields]) AND ("cell line"[MeSH Terms] OR ("cell"[All Fields] AND "line"[All Fields]) OR "cell lineS"[All Fields] OR ("cell"[All Fields] AND "lines"[All Fields]) OR "cell lines"[All Fields]) OR G150[All Fields] OR ("lethal dose 50"[MeSH Terms] OR "lethal dose 50"[All Fields] OR "ld50"[All Fields]) OR EC50[All Fields] OR ("in vitro techniques"[MeSH Terms] OR ("vitro"[All Fields] AND "techniques"[All Fields]) OR "in vitro techniques"[All Fields] OR "vitro"[All Fields] OR "in vitro"[All Fields]) AND (y_5[Filter]) AND (Rhenium OR "Re(II)" OR "Re(IV)" OR "Re(III)")) |
|--------------------------------------------------------------------------------------------------------------------------------------------------------------------------------------------------------------------------------------------------------------------------------------------------------------------------------------------------------------------------------------------------------------------------------------------------------------------------------------------------------------------------------------------------------------------------------------------------------------------------------------------------------------------------------------------------------------------------------------------------------------------------------------------------------------------------------------------------------------------------------------------------------------------------------------------------------|--------------------------------------------------------------------------------------------------------------------------------------------------------------------------------------------------------------------------------------------------------------------------------------------------------------------------------------------------------------------------------------------------------------------------------------------------------------------------------------------------------------------------------------------------------------------------------------------------------------------------------------------------------------------------------------------------------------------------------------------------------------------------------------------------------------------------------------------------------------------------------------------------------------------------------------------------------------------|-------------------------------------------------------------------------------------------------------------------------------------------------------------------------------------------------------------------------------------------------------------------------------------------------------------------------------------------------------------------------------------------------------------------------------------------------------------------------------------------------------------------------------------------------------------------------------------------------------------------------------------------------------------------------------------------------------------------------------------------------------------------------------------------------------------------------------------------------------------------------------------------------------------------------------------------------------------------|-----------------------------------------------------------------------------------------------------------------------------------------------------------------------------------------------------------------------------------------------------------------------------------------------------------------------------------------------------------------------------------------------------------------------------------------------------------------------------------------------------------------------------------------------------------------------------------------------------------------------------------------------------------------------------------------------------------------------------------------------------------------------------------------------------------------------------------------------------------------------------------------------------------------------------------------------------------|------------------------------------------------------------------------------------------------------------------------------------------------------------------------------------------------------------------------------------------------------------------------------------------------------------------------------------------------------------------------------------------------------------------------------------------------------------------------------------------------------------------------------------------------------------------------------------------------------------------------------------------------------------------------------------------------------------------------------------------------------------------------------------------------------------------------------------------------------------------------------------------------------------------------------------------------------------|

\*Search terms "Os" and "Re" had to be removed from search terms as they elicited too many irrelevant papers for example "RE" to mean regarding and "OS" to stand for osteogenic sarcoma (cancer).
